# Supplementary material for: Efficient anchoring of CuO nanoparticles on Ugi four-component-functionalized graphene quantum dots: colloidal soluble nanoplatform with great photoluminescent and antibacterial properties
Source: Royal Society of Chemistry journal article supplement (doi:10.1039/d1re00455g), 2022-01-01
Supplement: d1re00455g1.pdf [file d1re00455g1.pdf]

## Supplementary Information

### Efficient anchoring CuO nanoparticles on Ugi four-component-functionalized graphene quantum dots: Colloidal soluble nanoplatform with great photoluminescent and antibacterial properties

Siamak Javanbakht<sup>a</sup>, Vida Khodkari<sup>a</sup>, Mohamm Taghi Nazeri<sup>a</sup>, Ahmad Shaabani<sup>a,\*</sup>

<sup>a</sup>Faculty of Chemistry, Shahid Beheshti University, G.C., P.O. Box 19396-4716, Tehran, Iran

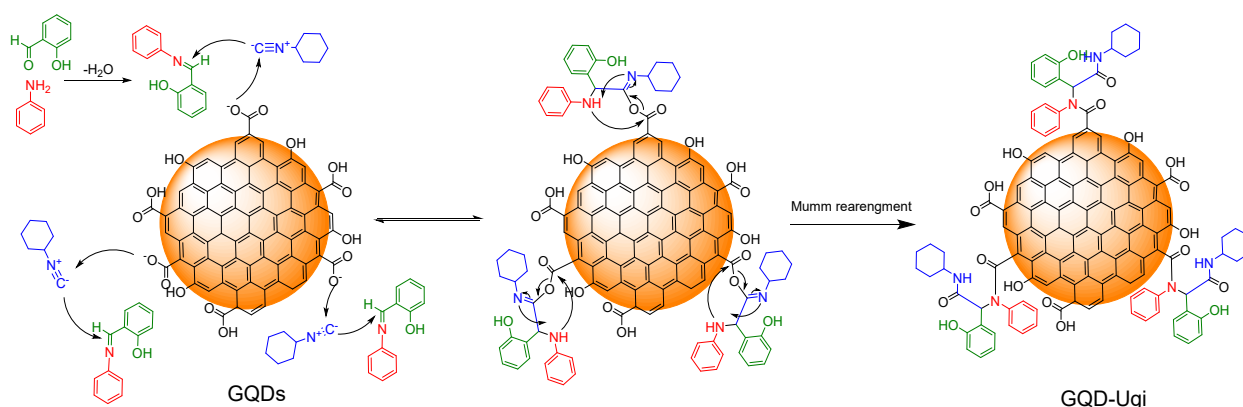

**Figure S1.** Proposed mechanism for the carboxamide functionalization of GQDs *via* the Ugi-4CR.

#### CuO nanoparticles synthesis

CuO nanoparticles were synthesized through the direct thermal decomposition process according to the previous work.<sup>1</sup> Typically, the precursor material was prepared by adding 530 mg (5.0 mmol) of Na<sub>2</sub>CO<sub>3</sub> into 10 mL of 0.5 M CuSO<sub>4</sub> solution and sonicate at 60 °C using an ultrasonic bath (Backer vCLEAN1-L6 Ultrasonic). The green precipitate, Cu<sub>4</sub>(SO<sub>4</sub>)(OH)<sub>6</sub>, was collected and washed three times with warm distilled water to remove possible remaining ions and

\* Corresponding author. Fax: +982122431663, Tel: +982129902800, E-mail address: [a-shaabani@sbu.ac.ir](mailto:a-shaabani@sbu.ac.ir)

dried at 70 °C for 8 h. Finally, resultant precursor was treated in a pre-heated muffle furnace at 600 °C. After 2 h, the brownish black product, CuO nanoparticles, was collected.

## Reference

1. D. Das, B. C. Nath, P. Phukon and S. K. Dolui, *Colloids and Surfaces B: Biointerfaces*, 2013, **101**, 430-433.
